# Supplementary material for: Heavy metal pollution and human health risk assessment at mercury smelting sites in Wanshan district of Guizhou Province, China
Source: Royal Society of Chemistry journal article supplement (doi:10.1039/d0ra01004a), 2020-01-01
Supplement: d0ra01004a1.pdf [file d0ra01004a1.pdf]

Table S1 Reference dose (RfD) and slope factor ( $S_f$ ) of HMs

| HMs | Non-carcinogenic reference dose/mg·(kg·d) <sup>-1</sup> |                  |                  | Carcinogenic slope factor/kg·d·mg <sup>-1</sup> |                 |                 |
|-----|---------------------------------------------------------|------------------|------------------|-------------------------------------------------|-----------------|-----------------|
|     | RfD <sub>o</sub>                                        | RfD <sub>d</sub> | RfD <sub>i</sub> | S <sub>Fo</sub>                                 | S <sub>Fd</sub> | S <sub>Fi</sub> |
| As  | 3.00E-04                                                | 3.00E-04         | 3.00E-04         | 1.50E+00                                        | 3.66E+00        | 1.50E+01        |
| Be  | 2.00E-03                                                | —                | 2.00E-05         | —                                               | —               | 2.4E+00         |
| Cd  | 1.00E-03                                                | 2.50E-05         | 5.71 E-05        | —                                               | —               | 6.30E+00        |
| Cr  | 1.5 E+00                                                | 1.95E-02         | 2.86E-05         | —                                               | —               | —               |
| Cu  | 4.00E-02                                                | 4.00E-02         | —                | —                                               | —               | —               |
| Hg  | 1.60E-04                                                | 1.60E-04         | 8.75E-05         | —                                               | —               | —               |
| Ni  | 2.00E-02                                                | 8.00E-04         | 2.06E-02         | 1.70E+00                                        | 4.25E+01        | 9.01E-01        |
| Sb  | 4.00E-04                                                | —                | —                | —                                               | —               | —               |
| Pb  | 1.40E-04                                                | 1.40E-04         | —                | —                                               | —               | —               |
| Zn  | 3.00E-01                                                | 3.00E-01         | 3.00E-01         | —                                               | —               | —               |

Table S2 Pearson correlation analysis of HMs in soil with TOC and pH

| HMs | As      | Be      | Cd     | Cr     | Cu      | Hg      | Ni    | Pb      | Sb     | Zn     |
|-----|---------|---------|--------|--------|---------|---------|-------|---------|--------|--------|
| TOC | 0.730** | 0.819** | -0.046 | -0.004 | -.158   | 0.416** | 0.202 | -0.096  | -0.003 | 0.154  |
| pH  | 0.256   | 0.219   | -0.023 | -0.030 | -.473** | 0.227   | 0.038 | -0.300* | 0.318* | -0.057 |

Note: \*\* was significantly correlated at the 0.01 level (bilateral). \* significantly correlated at the 0.05 level (bilateral).

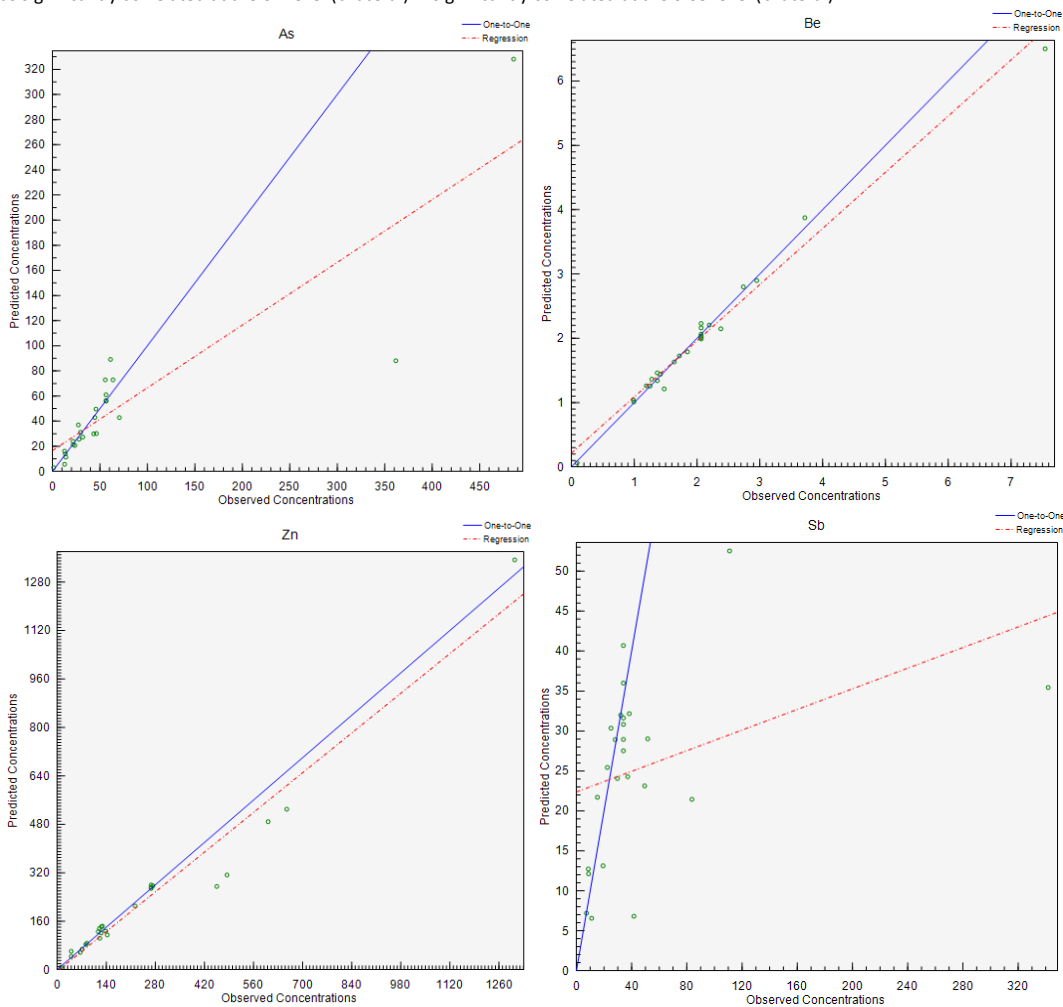

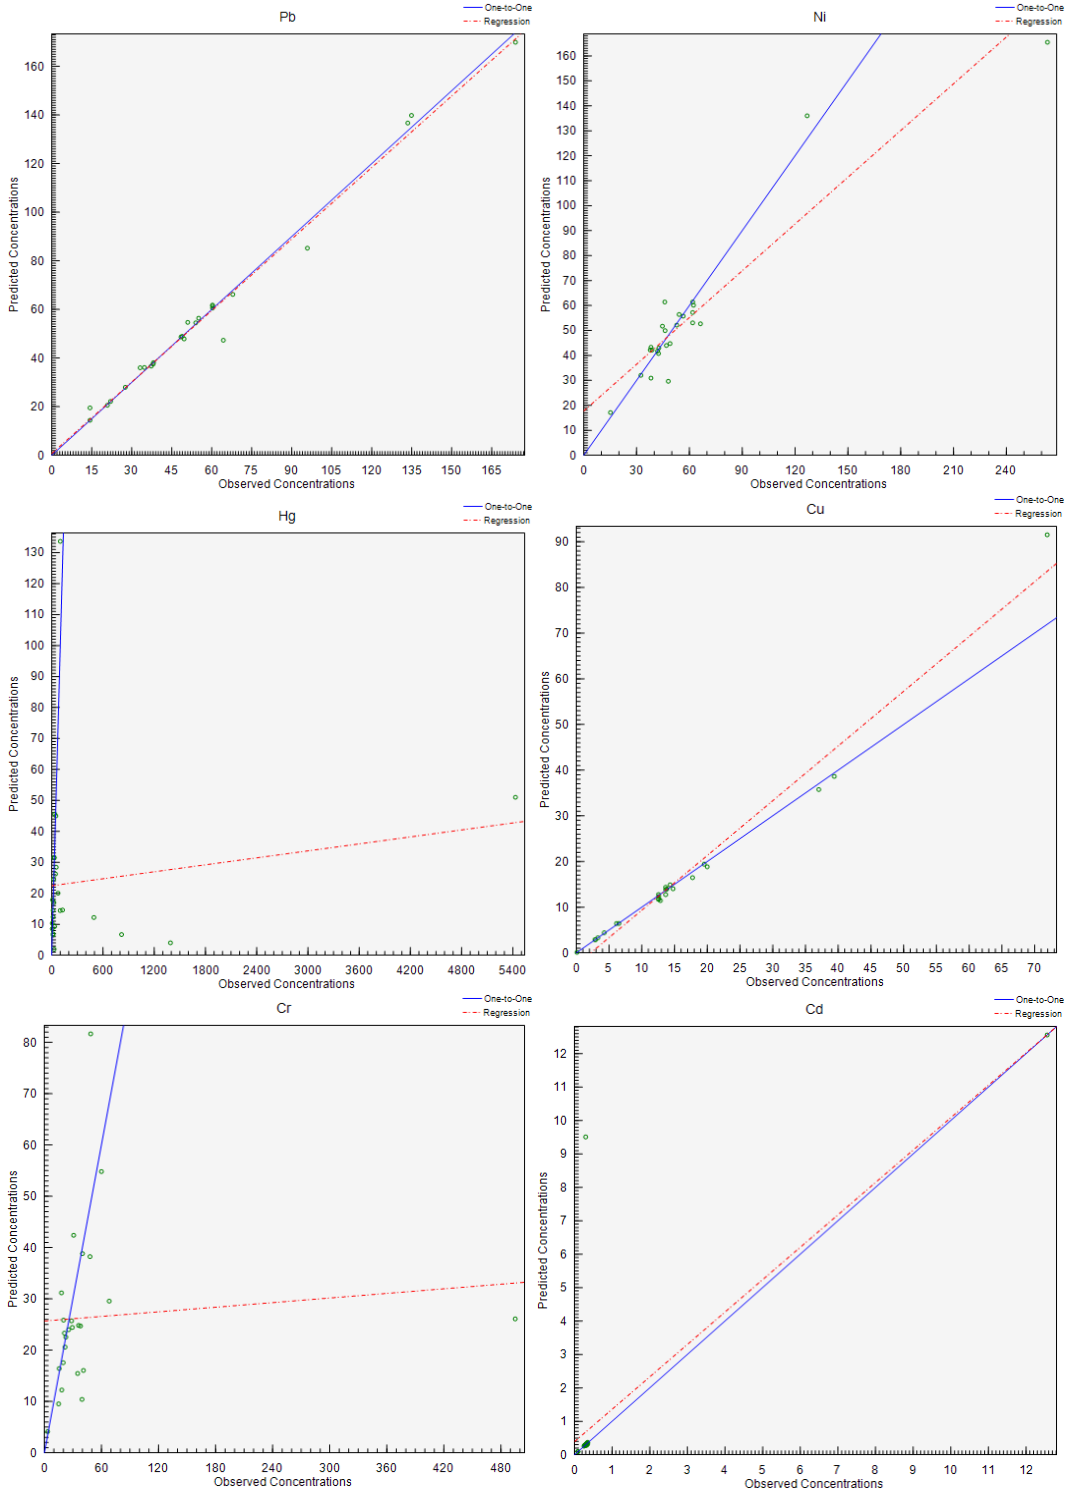

Fig.S1 Comparison of ten HMs content predicted by PMF model with measured

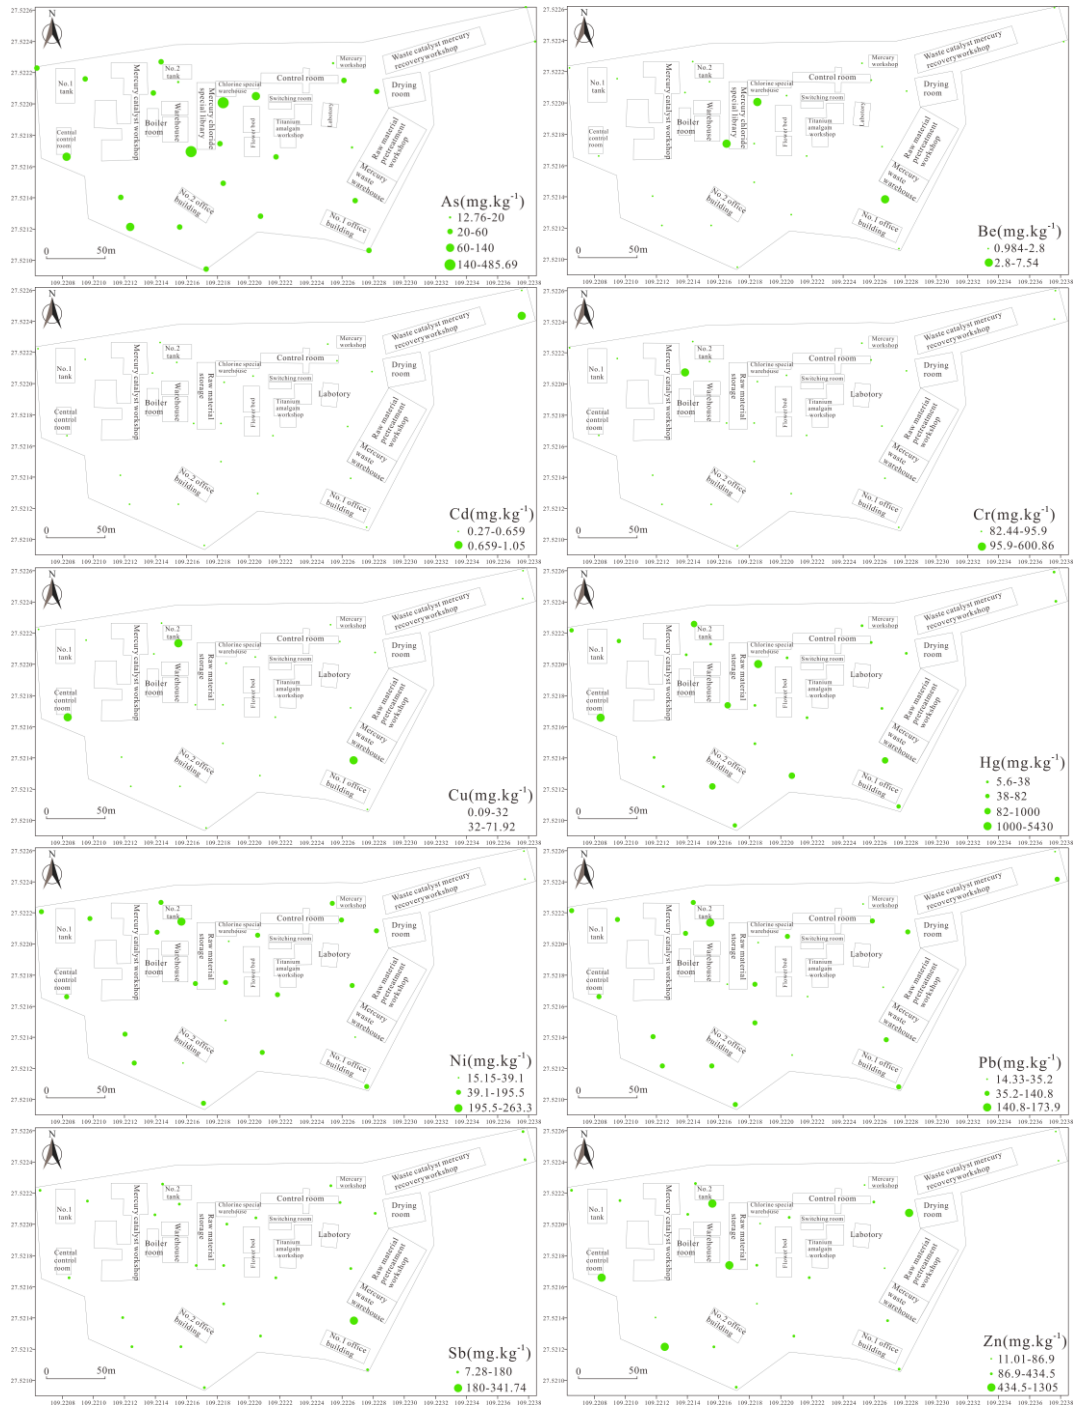

Fig.S2 Distribution of ten HMs concentration in twenty-five sampling points
